# Supplementary material for: The c-Abl inhibitor, Radotinib HCl, is neuroprotective in a preclinical Parkinson’s disease mouse model
Source: PubMed Central journal article supplement (PMC6005030; doi:10.1093/hmg/ddy143), 2018-04-20
Supplement: ddy143_supplementary_material_lee_et_al_hmg_(hmg-2018-twb-0055r).pdf [file ddy143_supplementary_material_lee_et_al_hmg_%28hmg-2018-twb-0055r%29.pdf]

## Supplementary Figure S1

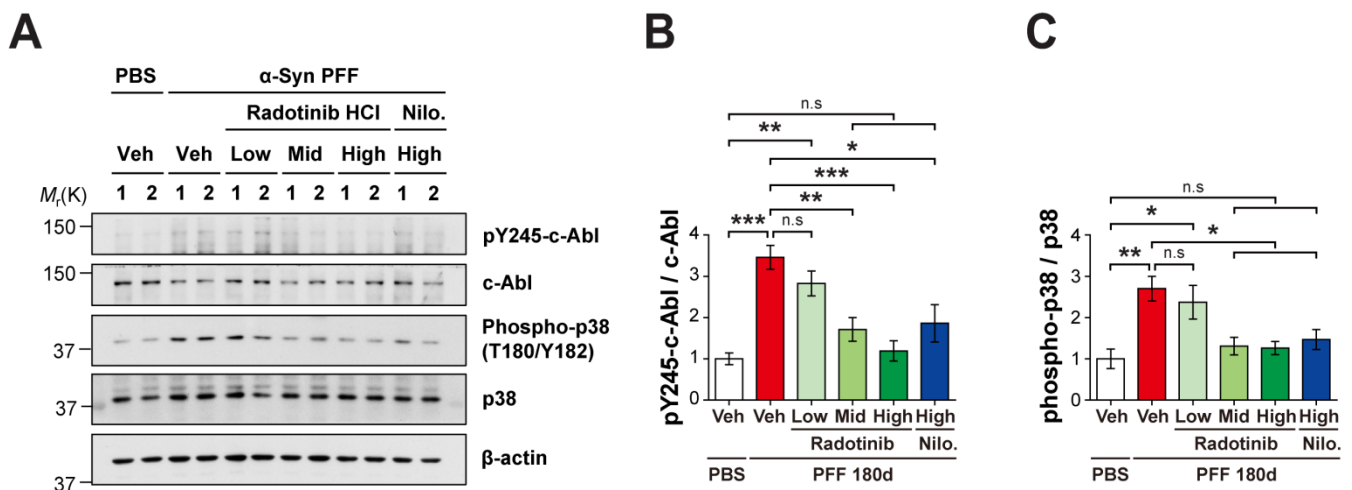

**Figure S1.** Radotinib HCl reduces  $\alpha$ -synuclein PFF-induced c-Abl activation and p38 MAPK phosphorylation *in vivo*.

(A) Representative immunoblots with ventral midbrain tissue lysates in PBS and  $\alpha$ -synuclein PFF stereotaxic injected mice treated with vehicle or Radotinib HCl and Nilotinib. (B) Quantification of the levels of pY245-c-Abl normalized to c-Abl. (C) Quantification of the levels of phospho-p38 MAPK normalized to p38 MAPK. Bars indicate mean  $\pm$  S.E.M. (n=4). Statistical significance was determined by using one-way ANOVA with Tukey's correction; \* $P < 0.05$ , \*\* $P < 0.01$ , \*\*\* $P < 0.001$ . n.s., not significant. Radotinib, Radotinib HCl. Nilo., Nilotinib.
